# Supplementary material
Source: PubMed Central journal article supplement (PMC3519172)
Supplement: supp_120422_salon-buetow-1-at.pdf [file supp_120422_salon-buetow-1-at.pdf]

## APPENDIX 1:

### References

1. Malterud K, Hollnagel H. The doctor who cried: a qualitative study about the doctor's vulnerability. *Ann Fam Med* 2005;3:348-52.
2. Polak EL, McCullough ME. Is gratitude an alternative to materialism? *J Happiness Stud* 2006;7:343-60.
3. Emmons R, ed. Greatest of the virtues? Gratitude and the grateful personality. Cambridge (UK): Cambridge University Press; 2009.
4. Froh JJ, Emmons RA, Card NA, et al. Gratitude and the reduced costs of materialism in adolescents. *J Happiness Stud* 2011;12:289-302.
5. Smilansky S. Gratitude, contribution and ethical theory. *Crit Rev Int Soc Polit Philos* 2002;5:34-48.
